# Supplementary material
Source: PubMed Central journal article supplement (PMC8919077)
Supplement: NIHMS1781060-supplement-2.pdf [file NIHMS1781060-supplement-2.pdf]

## ASSOCIATED CONTENT

### Supporting Information

The Supporting Information is available free of charge at  
[http://pubs.acs.org/doi/\\*\\*\\*](http://pubs.acs.org/doi/***)

Preparation of starting materials, optimization and control studies,  
characterization data for products [NMR and LC/mass spectrometry] ([PDF](#)).
